# Supplementary material
Source: PubMed Central journal article supplement (PMC8447279)
Supplement: bcd-20-0123_supplemental_table_1_suppst1.pdf [file bcd-20-0123_supplemental_table_1_suppst1.pdf]

Supplementary Table 1. Working Group Rosters

| Name                                          | Position                                                                                                                                                          | Affiliation                                               |
|-----------------------------------------------|-------------------------------------------------------------------------------------------------------------------------------------------------------------------|-----------------------------------------------------------|
| <b>Cochairs</b>                               |                                                                                                                                                                   |                                                           |
| Kenneth C. Anderson, MD, FAACR                | Program Director, Jerome Lipper Multiple Myeloma Center and LeBow Institute for Myeloma Therapeutics,                                                             | Dana-Farber Cancer Institute                              |
|                                               | Kraft Family Professor of Medicine                                                                                                                                | Harvard Medical School                                    |
| Lola A. Fashoyin-Aje, MD, MPH                 | Acting Deputy Director, Division of Oncology                                                                                                                      | U.S. Food and Drug Administration                         |
| Nicole Gormley, MD                            | Acting Director, Division of Hematologic Malignancies                                                                                                             | U.S. Food and Drug Administration                         |
| Paul G. Kluetz, MD                            | Deputy Director, Oncology Center of Excellence                                                                                                                    | U.S. Food and Drug Administration                         |
| <b>Working Group 1 (preapproval setting)</b>  |                                                                                                                                                                   |                                                           |
| Vishal Bhatnagar, MD                          | Acting Clinical Team Leader                                                                                                                                       | U.S. Food and Drug Administration                         |
| Ruemu E. Birhiray, MD                         | Partner                                                                                                                                                           | Hematology-Oncology of Indiana                            |
| Yelak Biru                                    | Patient Advocate                                                                                                                                                  |                                                           |
| Kathleen Bond                                 | Patient Advocate                                                                                                                                                  |                                                           |
| Craig E. Cole, MD                             | Director of Clinical Research                                                                                                                                     | Michigan State University Breslin Cancer Center           |
| Madhav V. Dhodapkar, MBBS                     | Professor and Anise McDaniel Brock Chair                                                                                                                          | Emory University School of Medicine                       |
| Sagar Lonial, MD, FACP                        | Chief Medical Officer, Winship Cancer Institute                                                                                                                   | Emory University                                          |
| Edith P. Mitchell, MD, MACP, FCPP             | Clinical Professor of Medicine and Medical Oncology, Sidney Kimmel Cancer Center                                                                                  | Thomas Jefferson University                               |
| Nikhil Munshi, MD                             | Director of Basic and Correlative Science, Jerome Lipper Multiple Myeloma Center and Lebow Institute for Myeloma Therapeutics, and Kraft Family Chair in Medicine | Dana-Farber Cancer Institute                              |
|                                               | Professor of Medicine                                                                                                                                             | Harvard Medical School                                    |
| S. Vincent Rajkumar, MD                       | Professor of Medicine                                                                                                                                             | Mayo Clinic College of Medicine                           |
| Elisa Weiss, PhD                              | Senior Vice President, Patient Access and Outcomes                                                                                                                | Leukemia and Lymphoma Society                             |
| <b>Working Group 2 (postapproval setting)</b> |                                                                                                                                                                   |                                                           |
| Sikander Ailawadhi, MD                        | Senior Associate Consultant                                                                                                                                       | Mayo Clinic Cancer Center Jacksonville                    |
| CAPT Richardae Araojo                         | Associate Commissioner for Minority Health and Director of the Office of Minority Health and Health Equity                                                        | U.S. Food and Drug Administration                         |
| Jim Bond                                      | Patient Advocate                                                                                                                                                  |                                                           |
| John D. Carpten, PhD                          | Chair, Department of Translational Genomics                                                                                                                       | University of Southern California Keck School of Medicine |
| Joya Harris                                   | Director of Research Integration                                                                                                                                  | American Cancer Society                                   |
| Bindu Kanapuru, MD                            | Medical Officer                                                                                                                                                   | U.S. Food and Drug Administration                         |
| Shaji K. Kumar, MD                            | Professor of Medicine                                                                                                                                             | Mayo Clinic Cancer Center                                 |
| Gary Lambert                                  | Patient Advocate                                                                                                                                                  |                                                           |

|                                             |                                                                                        |                                                                     |
|---------------------------------------------|----------------------------------------------------------------------------------------|---------------------------------------------------------------------|
| C. Ola Landgren, MD                         | Chief, Myeloma Service                                                                 | Memorial Sloan Kettering Cancer Center                              |
| Christine Lee, PharmD, PhD                  | General Health Scientist                                                               | U.S. Food and Drug Administration                                   |
| Richard F. Little, MD                       | Head - Hematologic, HIV, and Stem Cell Therapeutics, Cancer Therapy Evaluation Program | National Cancer Institute                                           |
| Joseph Mikhael, MD, MEd, FRCPC, FACP        | Chief Medical Officer                                                                  | International Myeloma Foundation; Professor                         |
| Anuradha Ramamoorthy, PhD                   | Policy Lead, Office of Clinical Pharmacology                                           | U.S. Food and Drug Administration                                   |
| Jeffrey Zonder, MD                          | Hematologist                                                                           | Wayne State University                                              |
| <b>Working Group 3 (Real-world setting)</b> |                                                                                        |                                                                     |
| Rafat Abonour, MD                           | Harry and Edith Gladstein Professor of Cancer Research                                 | Indiana University                                                  |
| Daniel Auclair, PhD                         | Chief Scientific Officer                                                               | Multiple Myeloma Research Foundation                                |
| Doris Browne, MD, MPH                       | President                                                                              | National Medical Association                                        |
| Kunthel By, PhD                             | Mathematical Statistician                                                              | U.S. Food and Drug Administration                                   |
| Keri Portis Daniel                          | Director                                                                               | Public Relations and Communications                                 |
| Irene M. Ghobrial, MD                       | Professor                                                                              | Dana-Farber Cancer Institute                                        |
| Candace Henley                              | Founder and Chief Executive Officer                                                    | Blue Hat Foundation                                                 |
| Meghan O'Connor                             | Administrative Assistant                                                               | International Myeloma Foundation                                    |
| Yuan-Li Shen, PhD                           | Biostatistician                                                                        | U.S. Food and Drug Administration                                   |
| William A. Wood, MD                         | Associate Professor                                                                    | University of North Carolina Lineberger Comprehensive Cancer Center |
| <b>Industry Working Group</b>               |                                                                                        |                                                                     |
| Roxanne Cacioppo, PhD                       | Global Medical Affairs Lead                                                            | GlaxoSmithKline                                                     |
| Ruthanna Davi, PhD                          | Vice President                                                                         | Acorn AI                                                            |
| Wan-Jen Hong, MD                            | Senior Medical Director                                                                | Genentech                                                           |
| Rachel Kobos, MD                            | Executive Medical Director                                                             | Janssen Pharmaceuticals                                             |
| Kathleen Maignan, MSN, NP                   | Clinical Director of Research Oncology                                                 | Flatiron Health                                                     |
| Mihaela Popa McKiver, MD, PHD               | Clinical Development Lead<br>Hematology Global Drug Development                        | Bristol-Myers Squibb                                                |
| Khalid Mezzi, MD, MBA                       | Global Multiple Myeloma Platform Lead                                                  | Amgen                                                               |
| Angela X. Qu, MD, PhD                       | Senior Director                                                                        | Translational Medicine                                              |
| Tomas Skacel, MD, PhD                       | Vice President, Head of Hematology, Global Medical Affairs                             | Takeda                                                              |
